# Supplementary material
Source: MDPI journal article supplement (https://www.mdpi.com/2073-4344/13/12/1505)
Supplement: s1 [file s1]

---

Supplementary information for

# Carbon Monoxide and Propylene Catalytic Oxidation Activity of Noble Metals (M = Pt, Pd, Ag, and Au) Loaded on the Surface of Ce<sub>0.875</sub>Zr<sub>0.125</sub>O<sub>2</sub> (110)

Chenxi Zhang <sup>1,2</sup>, Xuesong Cao <sup>2</sup>, Lili Guo <sup>1</sup>, Zhihao Fang <sup>1</sup>, Di Feng <sup>1,\*</sup> and Xiaomin Sun <sup>2</sup>

<sup>1</sup> Shandong Provincial University Laborator for Protected Horticulture, Weifang University of Science and Technology, Weifang 262700, China; sdzhangcx@gmail.com (C.Z.); 13279293652@163.com (L.G.); wfsgfzh@163.com (Z.F.)

<sup>2</sup> Environment Research Institute, Shandong University, Qingdao 266200, China; xuesongcao@mail.sdu.edu.cn (X.C.); sxmwch@sdu.edu.cn (X.S.)

\* Correspondence: Correspondence: fengdi2008sunny@163.com

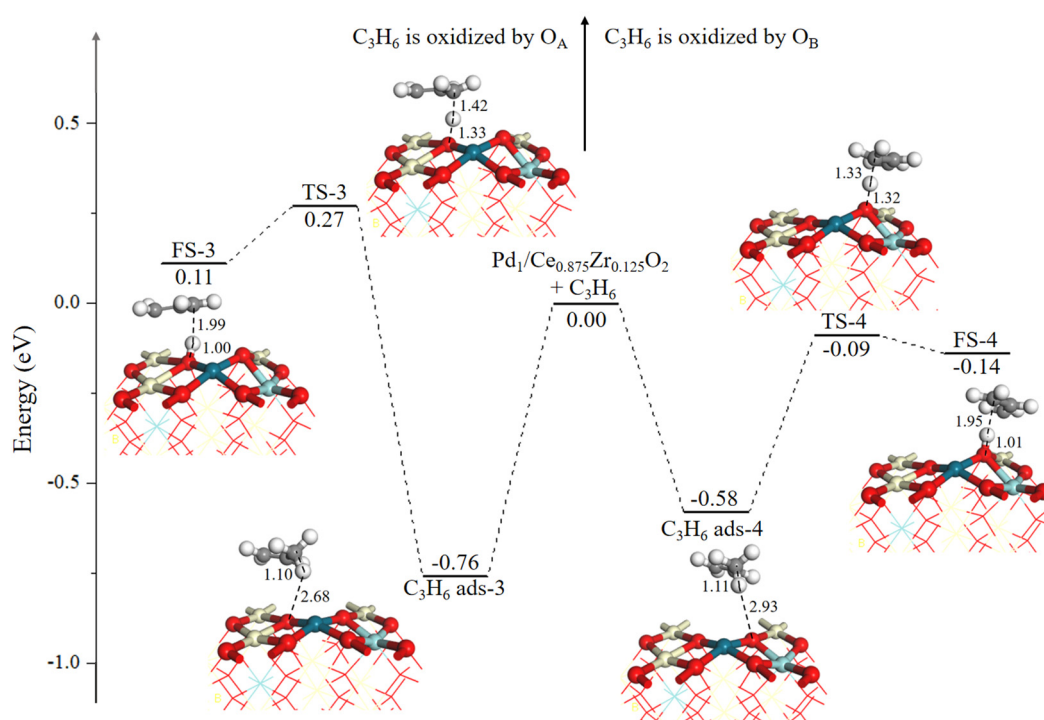

**Figure S1.** Calculated energy profile and corresponding optimized configurations of reactants, transition states and products of the activation of C<sub>sp3</sub>-H bond of C<sub>3</sub>H<sub>6</sub> on the Pd<sub>1</sub>/Ce<sub>0.875</sub>Zr<sub>0.125</sub>O<sub>2</sub> (110) surface.

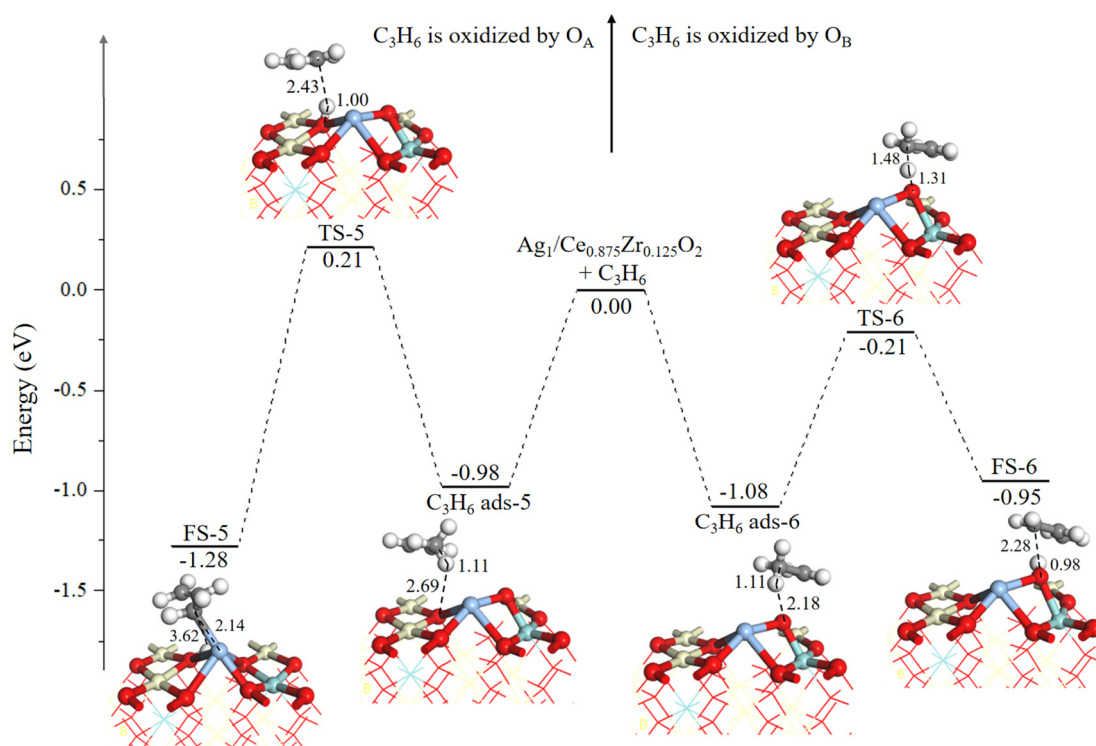

**Figure S2.** Calculated energy profile and corresponding optimized configurations of reactants, transition states and products of the activation of C<sub>sp3</sub>-H bond of C<sub>3</sub>H<sub>6</sub> on the Ag<sub>1</sub>/Ce<sub>0.875</sub>Zr<sub>0.125</sub>O<sub>2</sub> (110) surface.

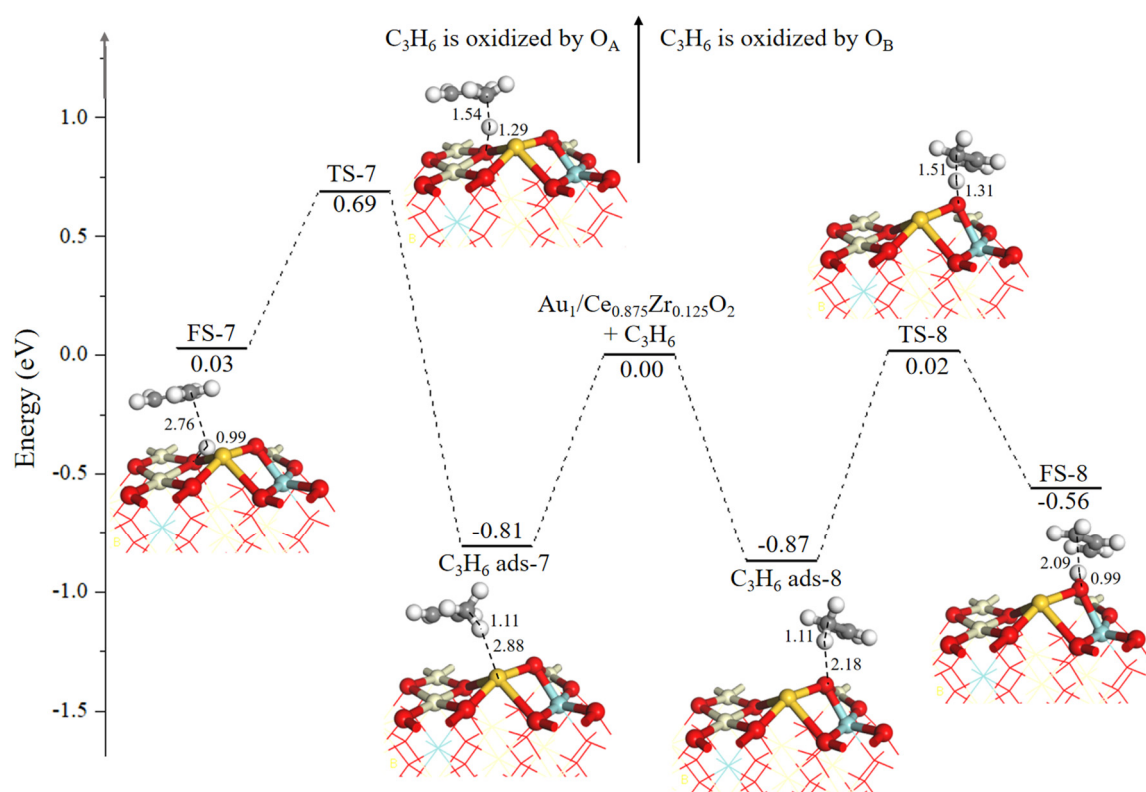

**Figure S3.** Calculated energy profile and corresponding optimized configurations of reactants, transition states and products of the activation of C<sub>sp3</sub>-H bond of C<sub>3</sub>H<sub>6</sub> on the Au<sub>1</sub>/Ce<sub>0.875</sub>Zr<sub>0.125</sub>O<sub>2</sub> (110) surface.

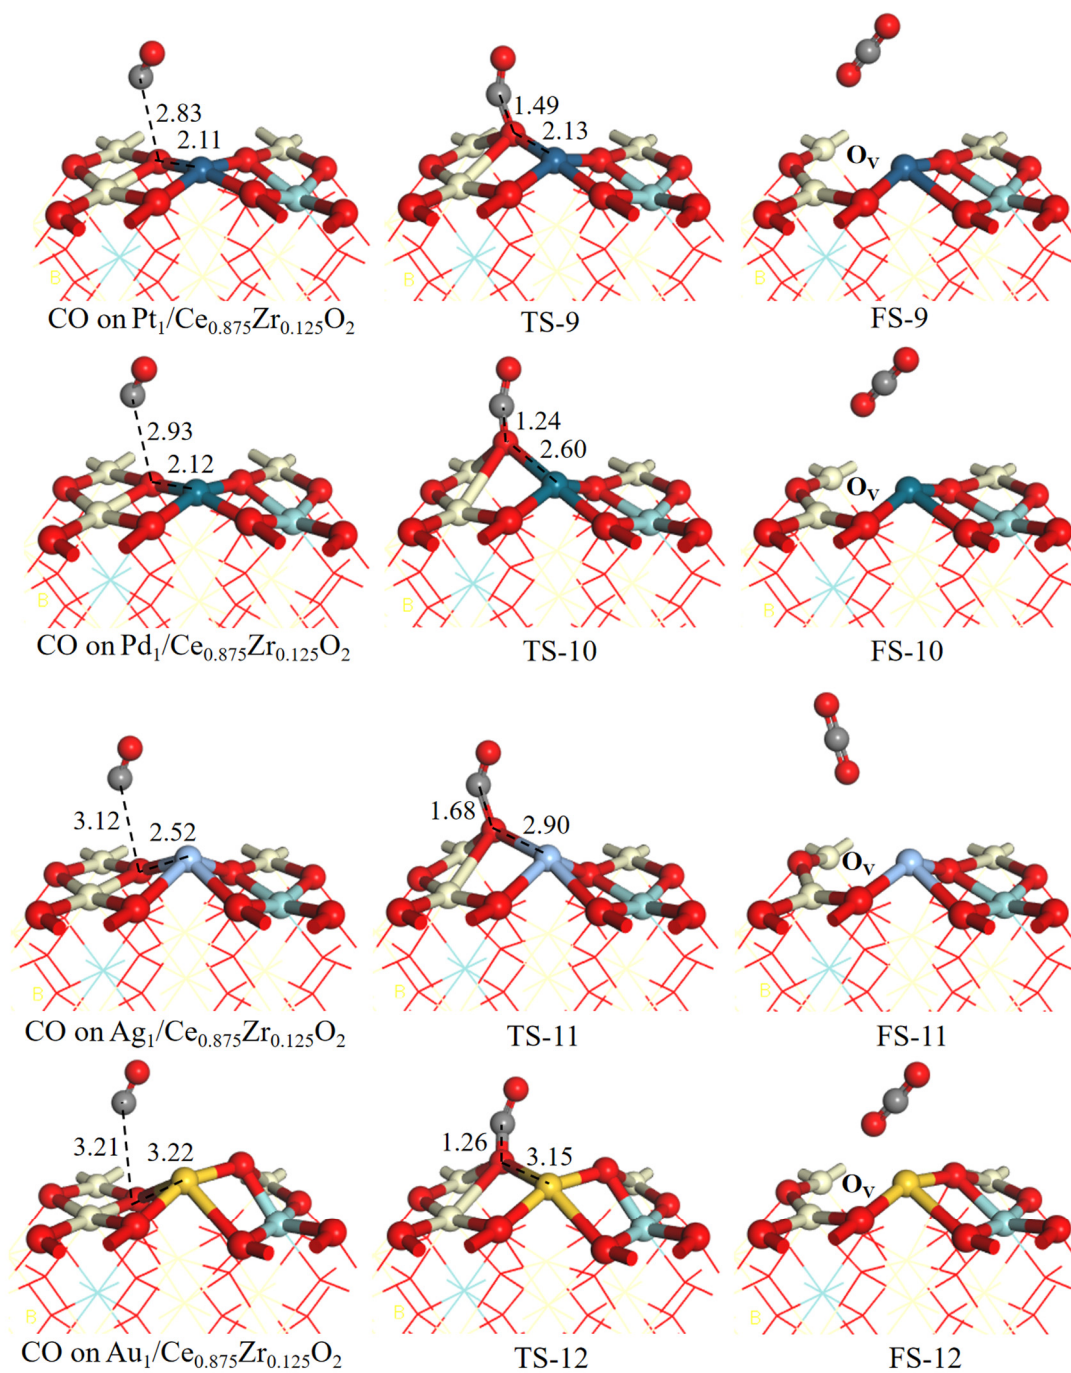

**Figure S4.** The reactants, transition states and products of CO oxidation reaction on the  $\text{Pt}_1/\text{Ce}_{0.875}\text{Zr}_{0.125}\text{O}_2$ ,  $\text{Pd}_1/\text{Ce}_{0.875}\text{Zr}_{0.125}\text{O}_2$ ,  $\text{Ag}_1/\text{Ce}_{0.875}\text{Zr}_{0.125}\text{O}_2$  and  $\text{Au}_1/\text{Ce}_{0.875}\text{Zr}_{0.125}\text{O}_2$  (110) surfaces.
